# Supplementary material for: Clinical Impact of Preoperative Biliary Drainage in Patients with Ductal Adenocarcinoma of the Pancreatic Head
Source: MDPI journal article supplement (doi:10.3390/diagnostics13071281), 2023-03-28
Supplement: s1 [file s1]

## Supplemental Data

**Table S1** – Comparison between patients undergoing preoperative biliary drainage (group 1) and those not submitted to this procedure (group 2).

IQR: interquartile range; AST: aspartate aminotransferase; ALT: alanine aminotransferase; AP: alkaline phosphatase; GGT: gamma-glutamyl transferase; BR: bilirubin; CA 19.9: carbohydrate antigen 19.9; CEA: carcinoembryonic antigen; POPF: postoperative pancreatic fistula; CDC: Clavien-Dindo classification; AJCC: American Joint Committee on Cancer; DFS: disease free survival; OS: overall survival

| Variable             | Preoperative biliary drainage |                       | <i>p</i> |
|----------------------|-------------------------------|-----------------------|----------|
|                      | Group 1: Yes (N=44)           | Group 2: No (N=84)    |          |
| Age (years)          |                               |                       |          |
| Median (IQR)         | 69 (61-74)                    | 69 (58.25-76)         | 0.980    |
| Min-Max              | 40-84                         | 41-86                 |          |
| Gender               |                               |                       |          |
| Female (%)           | 14 (31.8)                     | 36 (42.9)             | 0.224    |
| Male (%)             | 30 (68.2)                     | 48 (57.1)             |          |
| Preoperative sodium  |                               |                       |          |
| Median (IQR)         | 137 (135.25-140)              | 137 (134-139)         | 0.369    |
| Min-Max              | 129-142                       | 128-144.7             |          |
| Preoperative AST     |                               |                       |          |
| Median (IQR)         | 52 (29-83)                    | 108 (45.50-199.50)    | <0.001   |
| Min-Max              | 17-252                        | 9-668                 |          |
| Preoperative ALT     |                               |                       |          |
| Median (IQR)         | 55 (28.50-110)                | 140.50 (64.50-264.75) | <0.001   |
| Min-Max              | 15-259                        | 7-922                 |          |
| Preoperative FA      |                               |                       |          |
| Median (IQR)         | 233 (124.50-343.50)           | 434 (256-600.50)      | <0.001   |
| Min-Max              | 59-714                        | 50-2100               |          |
| Preoperative GGT     |                               |                       |          |
| Median (IQR)         | 243 (70.50-401.25)            | 450 (156-954)         | 0.004    |
| Min-Max              | 22-1362                       | 10-3001               |          |
| Preoperative BR      |                               |                       |          |
| Median (IQR)         | 3.300 (1.600-10.675)          | 15.85 (3.500-20.700)  | 0.001    |
| Min-Max              | 0.3-29.2                      | 0.3-31.7              |          |
| Preoperative Albumin |                               |                       |          |
| Median (IQR)         | 3.600 (3.200-3.850)           | 3.700 (3.100-4.000)   | 0.461    |
| Min-Max              | 2.3-7.3                       | 1.7-41.0              |          |

|                                    |                    |                      |       |
|------------------------------------|--------------------|----------------------|-------|
| Preoperative CA 19.9               |                    |                      |       |
| Median (IQR)                       | 163 (32-949)       | 243.5 (36.25-978.75) | 0.902 |
| Min-Max                            | 2-23911            | 2-6879               |       |
| Preoperative CEA                   |                    |                      |       |
| Median (IQR)                       | 3.25 (1.925-6.700) | 3.2 (1.9-4.9)        | 0.538 |
| Min-Max                            | 0.6-105            | 0.6-49               |       |
| Postoperative hospital stay (days) |                    |                      |       |
| Median (IQR)                       | 13 (10-16)         | 13 (9-20)            | 0.763 |
| Min-Max                            | 6-36               | 3-85                 |       |
| NSQIP- Surgical Risk Calculator    |                    |                      |       |
| Any complications                  |                    |                      |       |
| Mean (Min-Max)                     | 30.474 (19-42.4)   | 28.982 (17-36.2)     | 0.305 |
| Surgical site infection            |                    |                      |       |
| Mean (Min-Max)                     | 18.858 (13.3-24.6) | 17.769 (12.8-21)     | 0.123 |
| Readmission                        |                    |                      |       |
| Mean (Min-Max)                     | 16.142 (11.4-20.8) | 15.331 (8.2-20)      | 0.295 |
| Reintervention                     |                    |                      |       |
| Median (IQR)                       | 5.2 (4.3-6.1)      | 4.9 (4.3-5.4)        | 0.383 |
| Min-Max                            | 4.1-6.6            | 3.1-7.3              |       |
| Death                              |                    |                      |       |
| Median(IQR)                        | 0.8 (0.4-1.7)      | 0.6 (0.2-1.5)        | 0.440 |
| Min-Max                            | 0.1-6.5            | 0-3.4                |       |
| Sepsis                             |                    |                      |       |
| Mean (Min-Max)                     | 8.379 (4.7-12.2)   | 7.992 (3-13.1)       | 0.533 |
| Delayed gastric emptying           |                    |                      |       |
| Mean (Min-Max)                     | 15.389 (6.4-25.4)  | 15.979 (9.3-25.3)    | 0.610 |
| Operative time (hours)             |                    |                      |       |
| Median (IQR))                      | 7 (6-8.5)          | 7.75 (6.375-9)       | 0.212 |
| Min-Max                            | 4-16.5             | 3-11                 |       |
| Postoperative morbidity            |                    |                      |       |
| Yes (%)                            | 36 (81.8)          | 60 (71.4)            | 0.277 |
| No (%)                             | 8 (18.2)           | 22 (26.2)            |       |
| Postoperative hemorrhage           |                    |                      |       |
| Yes (%)                            | 7 (15.9)           | 9 (10.7)             | 0.428 |
| No (%)                             | 37 (84.1)          | 73 (86.9)            |       |
| Intraabdominal abscess             |                    |                      |       |
| Yes (%)                            | 6 (13.6)           | 18 (21.4)            | 0.257 |
| No (%)                             | 38 (86.4)          | 64 (76.2)            |       |
| Surgical site infection            |                    |                      |       |
| Yes (%)                            | 3 (6.8)            | 9 (10.7)             | 0.539 |
| No (%)                             | 41 (93.2)          | 73 (86.9)            |       |
| POPF grade B or C                  |                    |                      |       |

|                                       |                |               |        |
|---------------------------------------|----------------|---------------|--------|
| Yes (%)                               | 7 (16.7)       | 12 (15.6)     | 0.878  |
| No (%)                                | 35 (83.3)      | 65 (84.4)     |        |
| Delayed gastric emptying grade B or C |                |               |        |
| Yes (%)                               | 13 (29.5)      | 25 (29.8)     | 0.976  |
| No (%)                                | 30 (68.2)      | 57 (67.9)     |        |
| Readmission                           |                |               |        |
| Yes (%)                               | 22 (50)        | 41 (48.8)     | 1.000  |
| No (%)                                | 22 (50)        | 41 (48.8)     |        |
| CDC ≥ III                             |                |               |        |
| Yes (%)                               | 13 (29.5)      | 26 (31)       | 0.802  |
| No (%)                                | 31 (70.5)      | 56 (66.7)     |        |
| Postoperative mortality               |                |               |        |
| Yes (%)                               | 2 (4.5)        | 9 (11)        | 0.223  |
| No (%)                                | 49 (95.5)      | 73 (89)       |        |
| Intraoperative bile culture           |                |               |        |
| Positive (%)                          | 20 (45.5)      | 3 (3.6)       | <0.001 |
| Negative (%)                          | 12 (27.3)      | 45 (55.3)     |        |
| Multidrug-resistant bacteria          |                |               |        |
| Yes (%)                               | 9 (45)         | 1 (33.3)      | 1.000  |
| No (%)                                | 11 (55)        | 2 (66.7)      |        |
| Perioperative blood transfusion       |                |               |        |
| Yes (%)                               | 21 (47.7)      | 24 (28.6)     | 0.031  |
| No (%)                                | 23 (52.3)      | 60 (71.4)     |        |
| AJCC pT                               |                |               |        |
| pT1-T2 (%)                            | 36 (81.8)      | 67 (79.8)     | 0.780  |
| pT3-T4 (%)                            | 8 (18.2)       | 17 (20.2)     |        |
| Size (cm)                             |                |               |        |
| Median (IQR)                          | 2.55 (2.4-3.5) | 3.2 (2.675-4) | 0.036  |
| Min-Max                               | 1.5-9          | 0.4-6.5       |        |
| AJCC pN                               |                |               |        |
| N0 (%)                                | 8 (18.2)       | 20 (23.8)     | 0.464  |
| N1-N2 (%)                             | 36 (81.8)      | 64 (76.2)     |        |
| AJCC stage                            |                |               |        |
| I-II (%)                              | 30 (68.2)      | 62 (73.8)     | 0.501  |
| III-IV (%)                            | 14 (31.8)      | 22 (26.2)     |        |
| Margins                               |                |               |        |
| R0 (%)                                | 22 (50)        | 39 (46.4)     | 0.701  |
| R1-R2 (%)                             | 22 (50)        | 45 (53.6)     |        |
| Lymphovascular invasion               |                |               |        |
| Yes (%)                               | 40 (90.9)      | 63 (75)       | 0.031  |
| No (%)                                | 4 (9.1)        | 21 (25)       |        |
| Perineural invasion                   |                |               |        |

|                       |            |            |       |
|-----------------------|------------|------------|-------|
| Yes (%)               | 42 (95.5)  | 74 (88.1)  | 0.217 |
| No (%)                | 2 (4.5)    | 10 (11.9)  |       |
| Recurrence            |            |            | 0.453 |
| Yes (%)               | 26 (66.7)  | 44 (59.5)  |       |
| No (%)                | 13 (33.3)  | 30 (40.5)  |       |
| Local recurrence      |            |            | 0.297 |
| Yes (%)               | 13 (50)    | 16 (36.4)  |       |
| No (%)                | 13 (50)    | 27 (61.4)  |       |
| Pulmonary recurrence  |            |            | 0.048 |
| Yes (%)               | 15 (57.7)  | 14 (31.8)  |       |
| No (%)                | 11 (42.3)  | 28 (63.6)  |       |
| Hepatic recurrence    |            |            | 0.587 |
| Yes (%)               | 15 (57.7)  | 27 (61.4)  |       |
| No (%)                | 11 (42.3)  | 15 (34.1)  |       |
| Peritoneal recurrence |            |            | 0.828 |
| Yes (%)               | 5 (19.2)   | 9 (20.5)   |       |
| No (%)                | 21 (80.8)  | 33 (75)    |       |
| DFS (months)          |            |            | 0.192 |
| Median (Min-Max)      | 10 (3-61)  | 8 (0-25)   |       |
| 3-year DFS (%)        | 7.7        | 0          |       |
| 5-year DFS (%)        | 3.8        | 0          |       |
| OS (months)           |            |            | 0.833 |
| Median (Min-Max)      | 20 (0-120) | 18 (0-156) |       |
| 3-year OS (%)         | 30.2       | 27.8       |       |
| 5-year OS (%)         | 18.1       | 18.5       |       |

**Table S2** – Comparison between patients undergoing preoperative biliary drainage by endoscopic retrograde cholangiopancreatography (ERCP) (group 1.1) and by percutaneous transhepatic cholangiography (PTC) (group 1.2).

IQR: interquartile range; AST: aspartate aminotransferase; ALT: alanine aminotransferase; AP: alkaline phosphatase; GGT: gamma-glutamyl transferase; BR: bilirubin; CA 19.9: carbohydrate antigen 19.9; CEA: carcinoembryonic antigen; POPF: postoperative pancreatic fistula; CDC: Clavien-Dindo classification; AJCC: American Joint Committee on Cancer; DFS: disease free survival; OS: overall survival

| Variable                                        | Preoperative biliary drainage - route |                                | <i>p</i> |
|-------------------------------------------------|---------------------------------------|--------------------------------|----------|
|                                                 | Group 1.1: ERCP<br>(N=27)             | Group 1.2: CPT<br>(N=17)       |          |
| Age (years)<br>Mean (Min-Max)                   | 65.04 (40-83)                         | 71.47 (59-84)                  | 0.034    |
| Gender                                          |                                       |                                |          |
| Female (%)                                      | 8 (29.6)                              | 6 (35.3)                       | 0.694    |
| Male (%)                                        | 19 (70.4)                             | 11 (64.7)                      |          |
| Preoperative sodium<br>Mean (Min-Max)           | 138.222 (132-142)                     | 135.588 (129-142)              | 0.01     |
| Preoperative AST<br>Median (IQR)<br>Min-Max     | 46 (27-72)<br>19-174                  | 60.50 (38.75-108.50)<br>17-252 | 0.253    |
| Preoperative ALT<br>Median (IQR)<br>Min-Max     | 54 (26-111)<br>16-259                 | 56 (38.50-117)<br>15-158       | 0.847    |
| Preoperative FA<br>Median (IQR)<br>Min-Max      | 203 (118-396)<br>59-714               | 235 (149-303)<br>59-458        | 0.819    |
| Preoperative GGT<br>Median (IQR)<br>Min-Max     | 237 (47-445)<br>23-1362               | 313 (145-369)<br>22-1200       | 0.971    |
| Preoperative BR<br>Median (IQR)<br>Min-Max      | 3 (1.5-4.5)<br>0.3-29.2               | 9 (1.85-11.90)<br>1.3-22.9     | 0.162    |
| Preoperative Albumin<br>Median (IQR)<br>Min-Max | 3.7 (3.325-3.950)<br>2.3-4.4          | 3.4 (3.1-3.850)<br>2.3-7.3     | 0.482    |
| Preoperative CA 19.9<br>Median (IQR)<br>Min-Max | 216 (53.0675-571.25)<br>2.27-2429     | 163 (3.7-2144)<br>2-23911      | 0.751    |
| Preoperative CEA                                |                                       |                                |          |

|                                    |                    |                    |       |
|------------------------------------|--------------------|--------------------|-------|
| Median (IQR)                       | 3.3 (1.95-5.35)    | 3.1 (1.5-8.8)      | 0.885 |
| Min-Max                            | 0.67-20            | 0.6-3.1            |       |
| Drainage time (days)               |                    |                    |       |
| Median (IQR)                       | 33 (23-63.50)      | 22 (15-38)         | 0.027 |
| Min-Max                            | 6-507              | 7-108              |       |
| Drainage-related morbidity         |                    |                    |       |
| Yes (%)                            | 10 (37)            | 11 (64.7)          | 0.074 |
| No (%)                             | 17 (63)            | 6 (35.3)           |       |
| Drainage-related morbidity         |                    |                    |       |
| Acute cholangitis                  |                    |                    |       |
| Yes (%)                            | 6 (60)             | 2 (18.2)           | 0.080 |
| No (%)                             | 4 (40)             | 8 (81.8)           |       |
| Acute pancreatitis                 |                    |                    |       |
| Yes (%)                            | 3 (30)             | 0                  | 0.090 |
| No (%)                             | 7 (70)             | 11 (100)           |       |
| Bleeding                           |                    |                    |       |
| Yes (%)                            | 0                  | 3 (27.3)           | 0.214 |
| No (%)                             | 10 (100)           | 8 (72.7)           |       |
| Obstruction                        |                    |                    |       |
| Yes (%)                            | 2 (20)             | 0                  | 0.214 |
| No (%)                             | 8 (80)             | 11 (100)           |       |
| Drain mobilization                 |                    |                    |       |
| Yes (%)                            | 0                  | 6 (54.5)           | 0.012 |
| No (%)                             | 10 (100)           | 5 (45.5)           |       |
| Postoperative hospital stay (days) |                    |                    |       |
| Median (IQR)                       | 13 (10-21)         | 11 (8-29)          | 0.068 |
| Min-Max                            | 6-36               | 8-29               |       |
| NSQIP- Surgical Risk Calculator    |                    |                    |       |
| Any complications                  |                    |                    |       |
| Mean (Min-Max)                     | 28.167 (19-37.5)   | 34.429 (29.1-42.4) | 0.020 |
| Surgical site infection            |                    |                    |       |
| Mean (Min-Max)                     | 18.575 (13.3-24.6) | 19.343 (14.8-21.7) | 0.610 |
| Readmission                        |                    |                    |       |
| Mean (Min-Max)                     | 15.133 (11.4-19.5) | 17.871 (15.4-20.8) | 0.020 |
| Reintervention                     |                    |                    |       |
| Median (IQR)                       | 4.5 (4.225-5.425)  | 5.8 (5.4-6.2)      | 0.034 |
| Min-Max                            | 4.1-6.2            | 4.6-6.6            |       |
| Death                              |                    |                    |       |
| Median (IQR)                       | 0.4 (0.125-1.375)  | 1.9 (0.9-3.6)      | 0.005 |
| Min-Max                            | 0.1-1.7            | 0.8-6.5            |       |
| Sepsis                             |                    |                    |       |

|                                                             |                        |                       |       |
|-------------------------------------------------------------|------------------------|-----------------------|-------|
| Mean (Min-Max)<br>Delayed gastric emptying                  | 7.517 (4.7-11.5)       | 9.857 (7.7-12.2)      | 0.025 |
| Mean (Min-Max)                                              | 15.067 (6.4-25.4)      | 15.943 (12.6-21.5)    | 0.695 |
| Operative time (hours)<br>Median (IQR))<br>Min-Max          | 7 (6-8.375)<br>4-16.5  | 8 (6-9)<br>4-11       | 0.531 |
| Postoperative morbidity<br>Yes (%)<br>No (%)                | 24 (88.9)<br>3 (11.1)  | 12 (70.6)<br>5 (29.4) | 0.227 |
| Postoperative hemorrhage<br>Yes (%)<br>No (%)               | 5 (18.5)<br>22 (81.5)  | 2 (11.8)<br>15 (88.2) | 0.689 |
| Intraabdominal abscess<br>Yes (%)<br>No (%)                 | 6 (22.2)<br>21 (77.8)  | 0<br>17 (100)         | 0.067 |
| Surgical site infection<br>Yes (%)<br>No (%)                | 3 (11.1)<br>24 (88.9)  | 0<br>17 (100)         | 0.272 |
| POPF grade B or C<br>Yes (%)<br>No (%)                      | 5 (20)<br>20 (80)      | 2 (11.8)<br>15 (88.2) | 0.482 |
| Delayed gastric emptying grade B or C<br>Yes (%)<br>No (%)  | 12 (44.4)<br>15 (55.6) | 1 (5.9)<br>15 (88.2)  | 0.014 |
| Readmission<br>Yes (%)<br>No (%)                            | 14 (51.9)<br>13 (48.1) | 8 (47.1)<br>9 (52.9)  | 0.757 |
| CDC ≥ III<br>Yes (%)<br>No (%)                              | 16 (59.3)<br>11 (40.7) | 15 (88.2)<br>2 (11.8) | 0.040 |
| Postoperative mortality<br>Yes (%)<br>No (%)                | 1 (3.7)<br>26 (96.3)   | 1 (5.9)<br>16 (94.1)  | 1.000 |
| Intraoperative bile culture<br>Positive (%)<br>Negative (%) | 15 (55.6)<br>5 (18.5)  | 5 (29.4)<br>7 (41.2)  | 0.130 |
| Multidrug-resistant bacteria<br>Yes (%)<br>No (%)           | 7 (46.7)<br>8 (53.3)   | 2 (40)<br>3 (60)      | 1.000 |
| Perioperative blood transfusion<br>Yes (%)                  | 13 (48.1)              | 8 (47.1)              | 0.944 |

|                         |               |               |       |
|-------------------------|---------------|---------------|-------|
| No (%)                  | 14 (51.9)     | 9 (52.9)      |       |
| AJCC pT                 |               |               |       |
| pT1-T2 (%)              | 20 (74.1)     | 16 (94.1)     | 0.125 |
| pT3-T4 (%)              | 7 (25.9)      | 1 (5.9)       |       |
| Size (cm)               |               |               |       |
| Median (IQR)            | 3 (2.45-3.65) | 2.5 (2.3-3.5) | 0.307 |
| Min-Max                 | 1.5-9         | 1.8-4.5       |       |
| AJCC pN                 |               |               |       |
| N0 (%)                  | 4 (14.8)      | 4 (23.5)      | 0.690 |
| N1-N2 (%)               | 23 (85.2)     | 13 (76.5)     |       |
| AJCC stage              |               |               |       |
| I-II (%)                | 17 (63)       | 13 (76.5)     | 0.349 |
| III-IV (%)              | 10 (37)       | 4 (23.5)      |       |
| Margins                 |               |               |       |
| R0 (%)                  | 13 (48.1)     | 9 (52.9)      | 0.757 |
| R1-R2 (%)               | 14 (51.9)     | 8 (47.1)      |       |
| Lymphovascular invasion |               |               |       |
| Yes (%)                 | 24 (88.9)     | 16 (94.1)     | 1.000 |
| No (%)                  | 3 (11.1)      | 1 (5.9)       |       |
| Perineural invasion     |               |               |       |
| Yes (%)                 | 25 (92.6)     | 17 (100)      | 0.515 |
| No (%)                  | 2 (7.4)       | 0             |       |
| Recurrence              |               |               |       |
| Yes (%)                 | 16 (66.7)     | 10 (66.7)     | 1.000 |
| No (%)                  | 8 (33.3)      | 5 (33.3)      |       |
| Local recurrence        |               |               |       |
| Yes (%)                 | 8 (50)        | 5 (50)        | 1.000 |
| No (%)                  | 8 (50)        | 5 (50)        |       |
| Pulmonary recurrence    |               |               |       |
| Yes (%)                 | 11 (68.8)     | 4 (40)        | 0.228 |
| No (%)                  | 5 (31.3)      | 6 (60)        |       |
| Hepatic recurrence      |               |               |       |
| Yes (%)                 | 7 (43.8)      | 8 (80)        | 0.109 |
| No (%)                  | 9 (56.3)      | 2 (20)        |       |
| Peritoneal recurrence   |               |               |       |
| Yes (%)                 | 2 (12.5)      | 3 (30)        | 0.340 |
| No (%)                  | 14 (87.5)     | 7 (70)        |       |
| DFS (months)            |               |               |       |
| Median (Min-Max)        | 10 (5-61)     | 5 (3-19)      | 0.017 |
| 3-year DFS (%)          | 12.5          | 0             |       |
| 5-year DFS (%)          | 6.3           | 0             |       |
| OS (months)             |               |               |       |
| Median (Min-Max)        | 24 (0-120)    | 14 (0-92)     | 0.258 |



|               |      |      |  |
|---------------|------|------|--|
| 3-year OS (%) | 36.5 | 18.5 |  |
| 5-year OS (%) | 18.2 | 18.5 |  |
